# Supplementary material for: Rapidly improved determination of metabolites from biological data sets using the high-efficient TransOmics tool
Source: Royal Society of Chemistry journal article supplement (doi:10.1039/c4mb00222a), 2014-05-23
Supplement: c4mb00222a1.pdf [file c4mb00222a1.pdf]

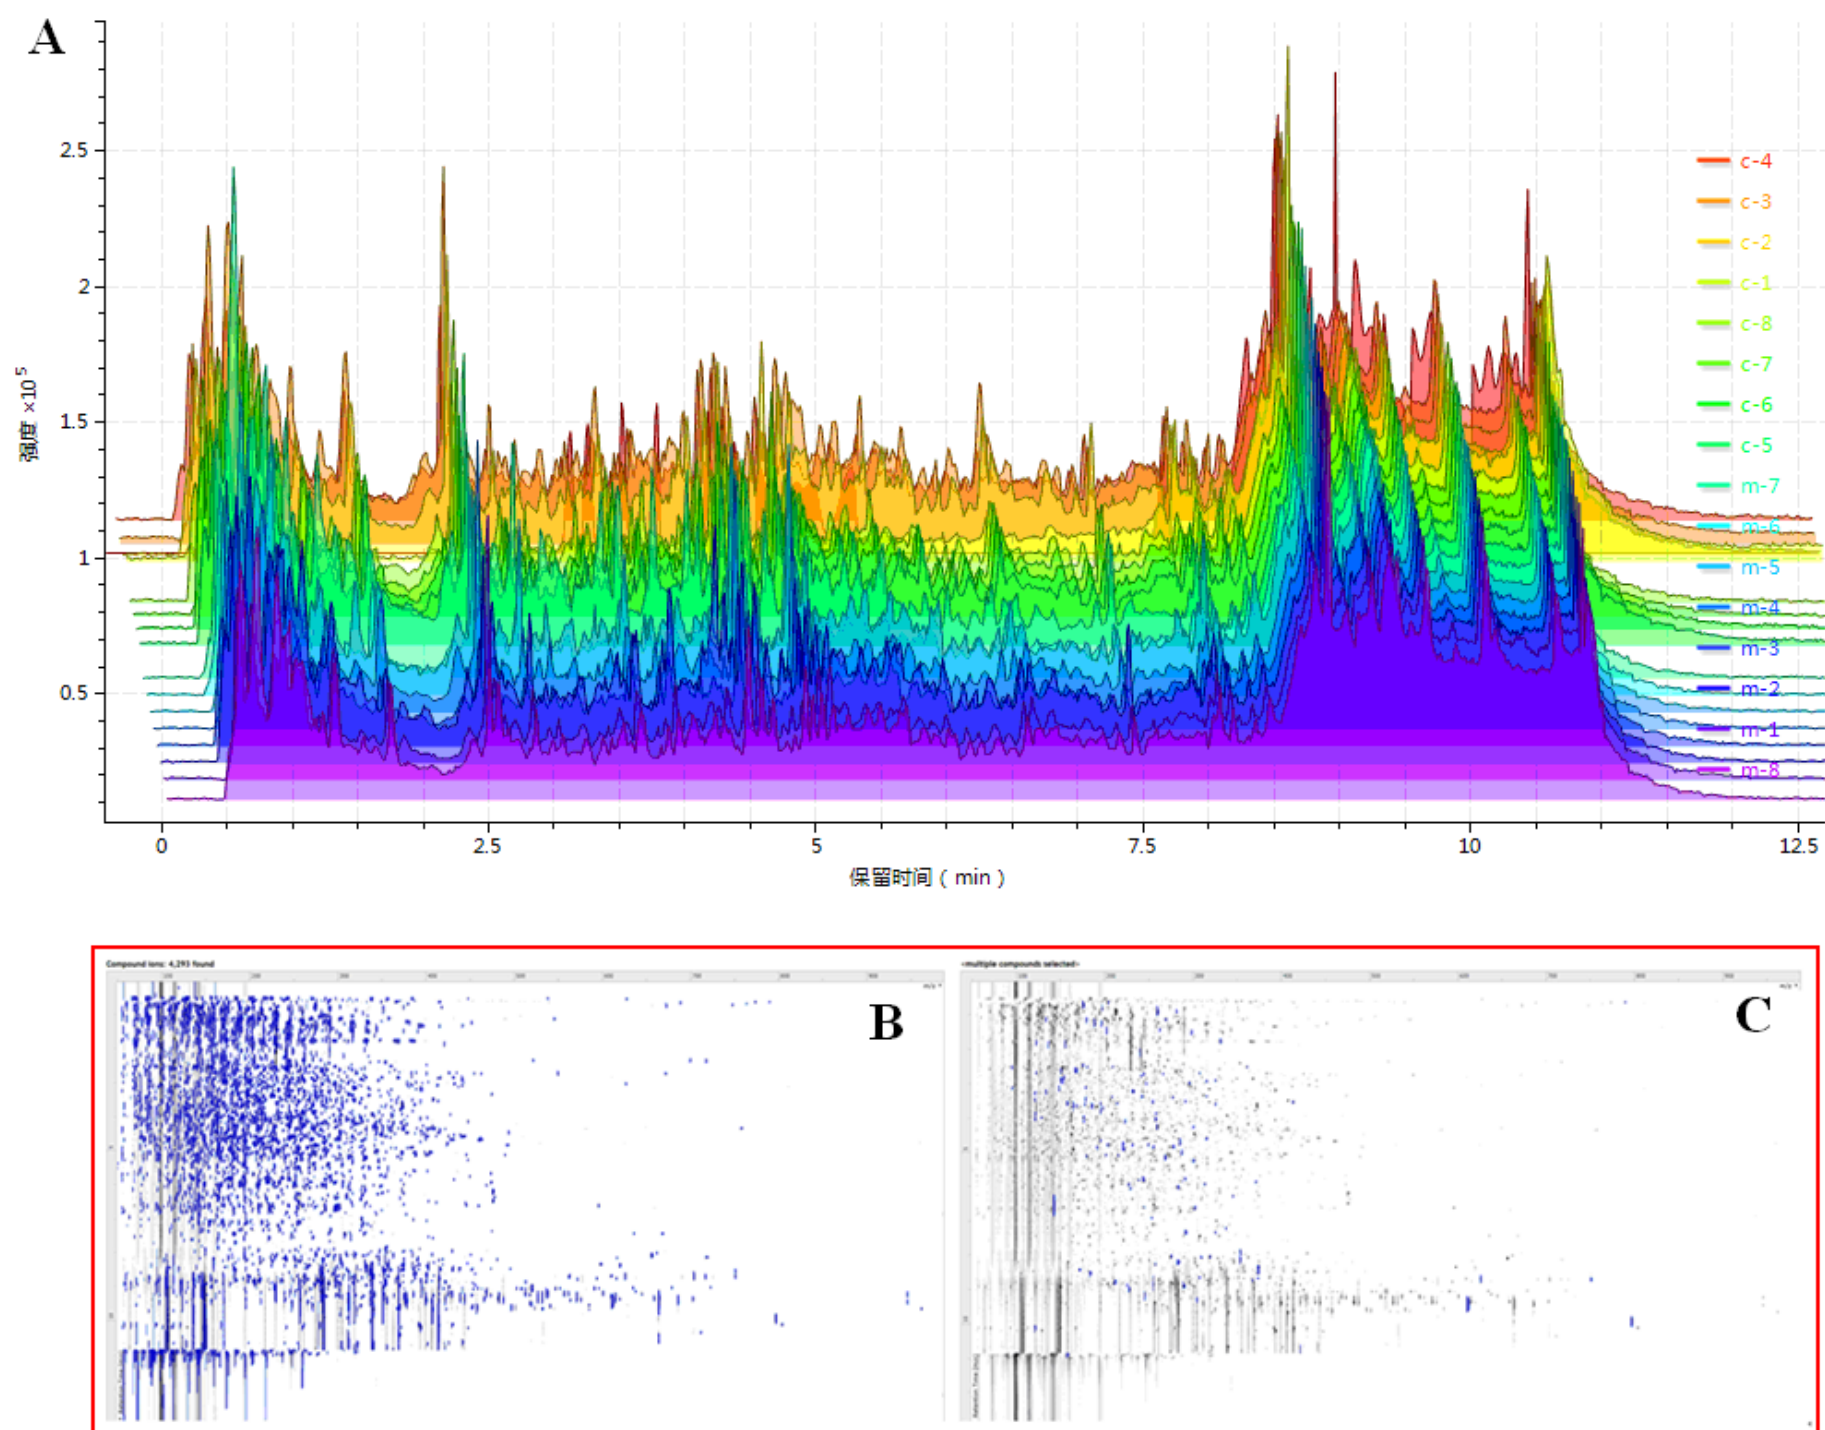

**Fig. S1.** Typical TIC chromatogram of control and model urine at positive ESI mode (A). The 2D ion intensity map taking a detailed approach to alignment (B,C). The map (B) return to (C) after having generated the Alignment vectors automatically. The Alignment algorithm will generate 'compound ions' in the retention time direction (see C). The 'compound ions' will be highlighted in blue.
