# Supplementary material for: Rapidly improved determination of metabolites from biological data sets using the high-efficient TransOmics tool
Source: Royal Society of Chemistry journal article supplement (doi:10.1039/c4mb00222a), 2014-05-23
Supplement: c4mb00222a2.pdf [file c4mb00222a2.pdf]

**Table S1.** Identification of urinary biomarkers in model cases by TransOmics

| No | Rt(min) | m/z    | Compound ID | Adducts | Formula     | Mass Error (ppm) | Description                                                    | Fold Change | Anova (p) |
|----|---------|--------|-------------|---------|-------------|------------------|----------------------------------------------------------------|-------------|-----------|
| 1  | 0.63    | 203.94 | HMDB04143   | M+Na    | HTa         | 4.76             | Tantalum                                                       | 3.51        | 0.0021    |
| 2  | 2.48    | 175.11 | HMDB03357   | M+H     | C7H14N2O3   | -4.66            | N-Acetylornithine                                              | 1.48        | 0.0051    |
| 3  | 2.73    | 244.11 | HMDB01458   | M+H     | C10H17N3O2S | -3.63            | Biotin amide                                                   | 2.40        | 0.0056    |
| 4  | 2.77    | 241.13 | HMDB00745   | M+H     | C10H16N4O3  | -1.54            | Homocarnosine                                                  | 3.31        | 0.0052    |
| 5  | 2.82    | 154.00 | HMDB03585   | M+H     | C3H7NO2S2   | -1.09            | Thiocysteine                                                   | 6.98        | 0.0006    |
| 6  | 2.98    | 295.10 | HMDB04810   | M+Na    | C16H16O4    | 3.58             | 5C-aglycone                                                    | 2.02        | 0.0063    |
| 7  | 3.12    | 148.06 | HMDB00148   | M+H     | C5H9NO4     | 3.61             | L-Glutamic acid                                                | 1.59        | 0.0018    |
| 8  | 3.37    | 315.06 | HMDB01308   | M+H     | C8H15N2O9P  | -0.53            | 5'-Phosphoribosyl-N-formylglycinamide                          | 15.12       | 0.0074    |
| 9  | 3.42    | 178.05 | HMDB01015   | M+H     | C6H11NO3S   | 0.87             | N-Formyl-L-methionine                                          | 1.99        | 0.0017    |
| 10 | 3.55    | 156.99 | HMDB00816   | M+H     | C2H5O6P     | 2.77             | Phosphoglycolic acid                                           | 2.21        | 0.0004    |
| 11 | 4.60    | 315.06 | HMDB01308   | M+H     | C8H15N2O9P  | 0.92             | 5'-Phosphoribosyl-N-formylglycinamide                          | 3.31        | 0.0008    |
| 12 | 4.78    | 220.01 | HMDB03705   | M+Na    | C3H8N3O5P   | 3.52             | Phosphoguanidinoacetate                                        | 6.42        | 0.0001    |
| 13 | 5.18    | 268.07 | HMDB01410   | M+H     | C9H9N5O5    | 4.57             | 2-Amino-4-oxo-6-(1',2'-dioxopropyl)-<br>7,8-dihydroxypteridine | 3.18        | 0.0006    |
| 14 | 5.78    | 291.13 | HMDB00052   | M+H     | C10H18N4O6  | 0.50             | Argininosuccinic acid                                          | 1.44        | 0.0022    |
| 15 | 5.86    | 371.19 | HMDB06278   | M+H     | C19H30O5S   | -3.89            | 5alpha-Dihydrotestosterone sulfate                             | 6.81        | 0.0356    |
| 16 | 6.01    | 283.02 | HMDB00645   | M+Na    | C6H13O9P    | 2.26             | Galactose 1-phosphate                                          | 1.49        | 0.0042    |
| 17 | 7.21    | 337.08 | HMDB04645   | M+H     | C10H16N4O7S | -2.05            | S-Nitrosoglutathione                                           | 10.34       | 0.0077    |

**Table S2.** Result from ingenuity pathway analysis with MetPA.

| Metabolic pathway                           | Total | Expected | Hits | Raw p     | Impact  |
|---------------------------------------------|-------|----------|------|-----------|---------|
| Arginine and proline metabolism             | 44    | 0.3766   | 3    | 0.0052089 | 0.11711 |
| Alanine, aspartate and glutamate metabolism | 24    | 0.20542  | 2    | 0.0167    | 0.28164 |
| D-Glutamine and D-glutamate metabolism      | 5     | 0.042796 | 1    | 0.042129  | 1       |
| Nitrogen metabolism                         | 9     | 0.077033 | 1    | 0.074653  | 0       |
| Histidine metabolism                        | 15    | 0.12839  | 1    | 0.12155   | 0       |
| Glyoxylate and dicarboxylate metabolism     | 16    | 0.13695  | 1    | 0.12915   | 0       |
| Butanoate metabolism                        | 20    | 0.17118  | 1    | 0.15895   | 0       |
| Glutathione metabolism                      | 26    | 0.22254  | 1    | 0.2019    | 0.05534 |
| Galactose metabolism                        | 26    | 0.22254  | 1    | 0.2019    | 0.13475 |
| Porphyrin and chlorophyll metabolism        | 27    | 0.2311   | 1    | 0.20886   | 0       |
| Cysteine and methionine metabolism          | 28    | 0.23966  | 1    | 0.21577   | 0       |
| Amino sugar and nucleotide sugar metabolism | 37    | 0.31669  | 1    | 0.27547   | 0.03099 |
| Aminoacyl-tRNA biosynthesis                 | 67    | 0.57347  | 1    | 0.44567   | 0       |
| Purine metabolism                           | 68    | 0.58203  | 1    | 0.45065   | 0.03915 |

Note: Total is the total number of compounds in the pathway; the Hits is the actually matched number from the user uploaded data; the Impact is the pathway impact value calculated from pathway topology analysis.
